# Supplementary material for: Elimination of the J–V hysteresis of planar perovskite solar cells by interfacial modification with a thermo-cleavable fullerene derivative
Source: Royal Society of Chemistry journal article supplement (doi:10.1039/c6ta06143e), 2016-01-01
Supplement: c6ta06143e1.pdf [file c6ta06143e1.pdf]

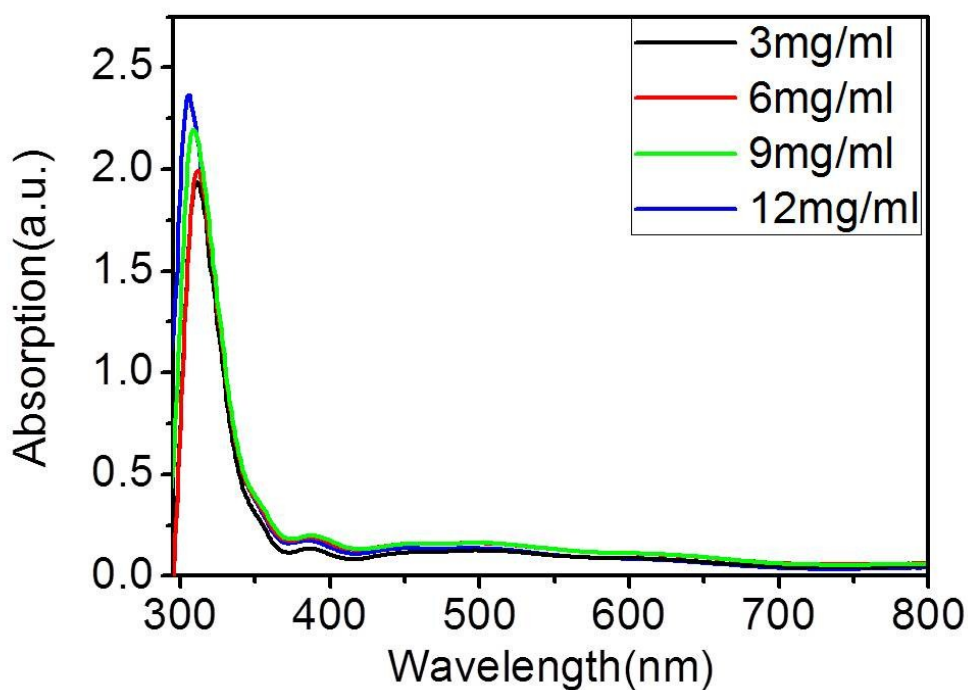

Fig. S1 UV-vis absorption spectra of TiO<sub>2</sub> via different concentration of MCA modification.

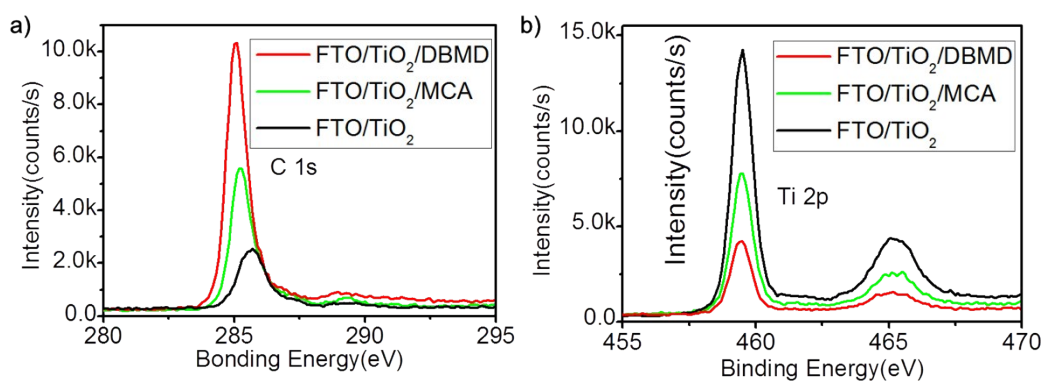

Fig. S2 Surface XPS analyses of a) carbon (285.0 eV (C1s)) and b) titanium (464.5 eV, 2p<sub>1/2</sub>, 458.8 eV, 2p<sub>3/2</sub>) from FTO/TiO<sub>2</sub> and FTO/TiO<sub>2</sub>/MCA substrates.

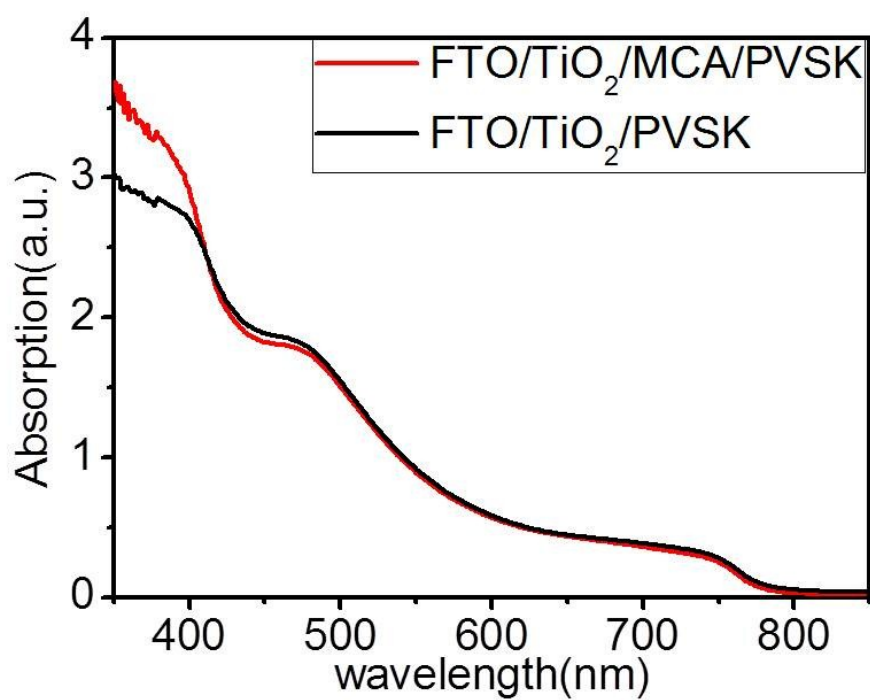

Fig. S3 Absorption spectra of perovskite film grown on  $\text{TiO}_2$  and  $\text{TiO}_2/\text{MCA}$ .

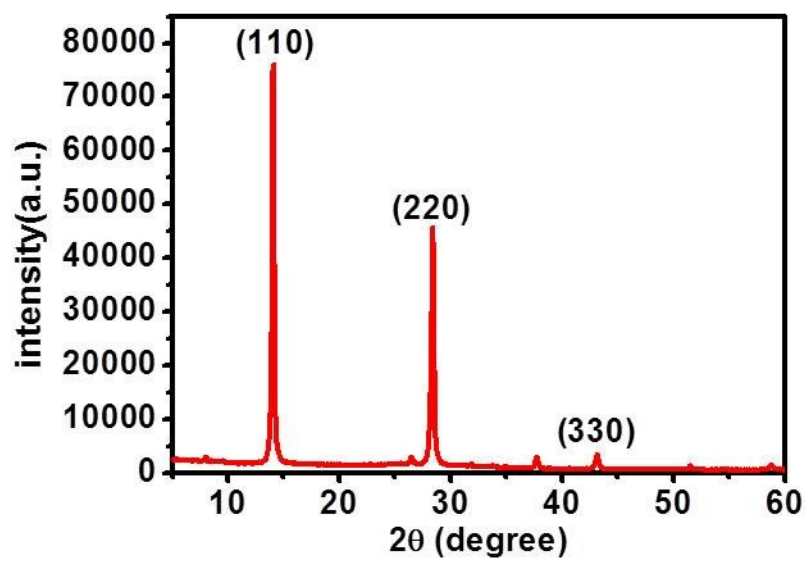

Fig. S4 XRD-pattern of the perovskite films grown on  $\text{TiO}_2$  with MCA modification.

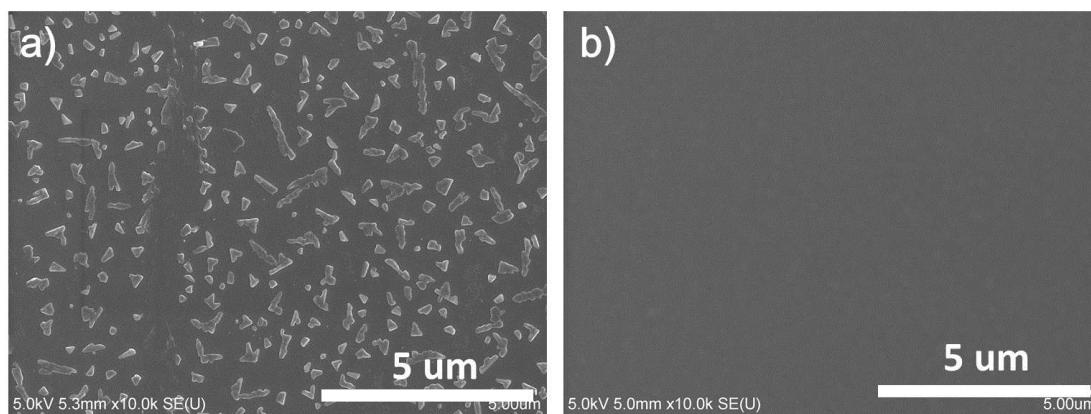

Fig. S5 SEM images of different substrate at the same scale a) FTO/ TiO<sub>2</sub>, b) FTO/ TiO<sub>2</sub>/MCA.

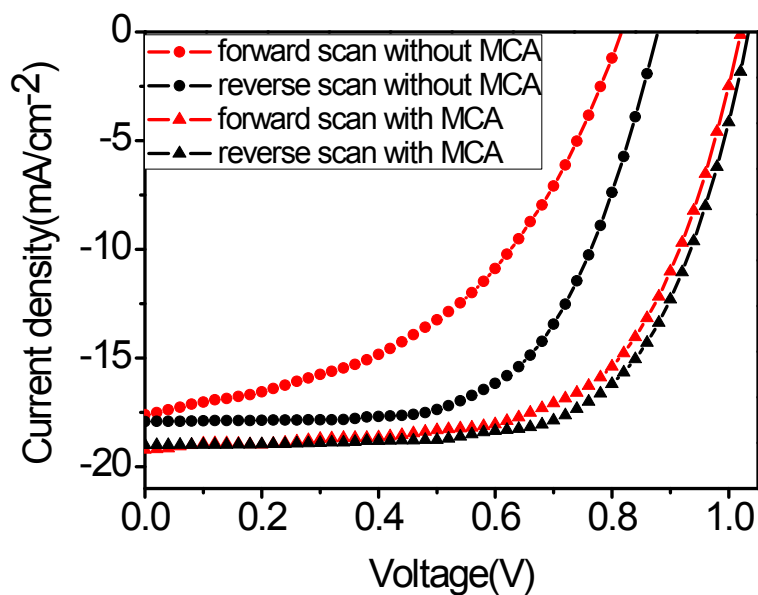

Fig. S6  $J$ - $V$  curves of larger active area cell from forward and reverse scan with and without MCA modification, with a delay time of 20 ms and a voltage step of 0.02 V s<sup>-1</sup>.

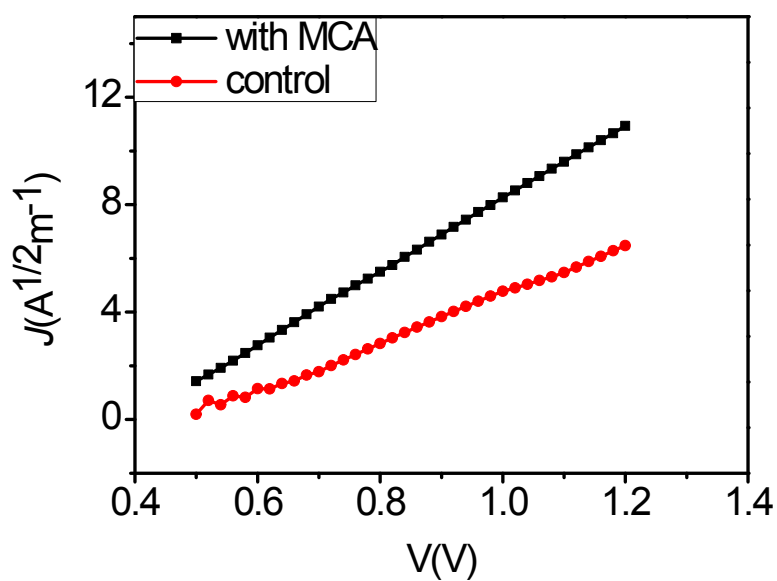

Fig. S7  $J$ - $V$  characteristics under dark for electron-only devices based on with and without MCA with the structure of FTO/ TiO<sub>2</sub>/PVSK/PCBM/Ag.

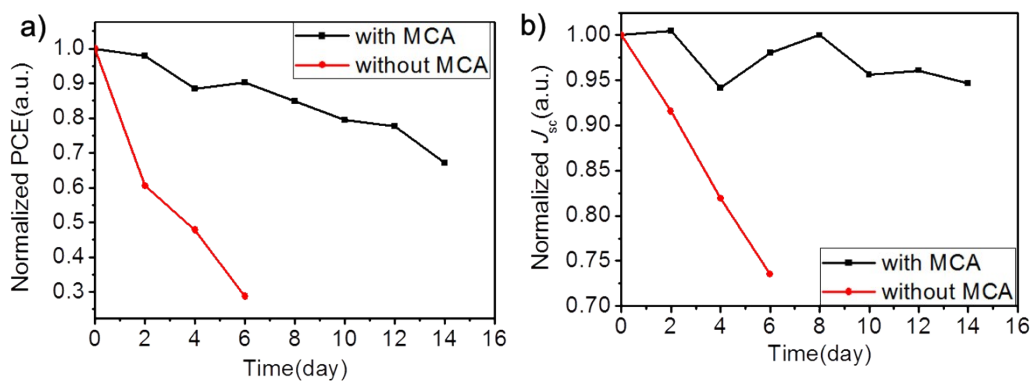

Fig. S8 Long-term stability tests of devices modified with MCA using forward scan mode.

**Different concentrations of DBMB**

| Device  | Voc(V) | Jsc(mA/cm <sup>2</sup> ) | FF    | PCE(%)<br>Average |
|---------|--------|--------------------------|-------|-------------------|
| Control | 0.987  | 12.5                     | 26.59 | 3.29              |
|         | 1.18   | 11.8                     | 47.13 | 5.54              |
| 3mg/ml  | 0.988  | 19.3                     | 43.81 | 8.35              |
|         | 1.05   | 19.6                     | 56.4  | 11.58             |
| 6mg/ml  | 1.09   | 19.7                     | 64.60 | 13.85             |
|         | 1.09   | 19.9                     | 65.12 | 14.07             |
| 9mg/ml  | 1.16   | 18.3                     | 66.66 | 14.14             |
|         | 1.15   | 19.2                     | 65.11 | 14.37             |
| 12mg/ml | 1.07   | 18.9                     | 59.78 | 12.16             |
|         | 1.08   | 18.9                     | 62.32 | 12.75             |

Table 1. Effect of MCA concentration on the performance of CH<sub>3</sub>NH<sub>3</sub>PbI<sub>3</sub> solar cells

| Device                      | Voc(V)            | Jsc(mA/cm <sup>2</sup> ) | FF                  | PCE(%)<br>Best      |
|-----------------------------|-------------------|--------------------------|---------------------|---------------------|
| c-TiO <sub>2</sub> (FS)     | 0.81 ± 0.01(0.82) | 16.58 ± 1.03(17.61)      | 49.21 ± 2.43(46.78) | 6.62 ± 0.11(6.73)   |
| c-TiO <sub>2</sub> (RS)     | 0.83 ± 0.05(0.80) | 18.06 ± 0.22(17.84)      | 55.28 ± 7.66(62.94) | 8.30 ± 1.56(9.86)   |
| c-TiO <sub>2</sub> /MCA(FS) | 1.02 ± 0.03(1.05) | 19.20 ± 0.25(19.45)      | 63.20 ± 2.03(61.17) | 12.39 ± 0.1(12.49)  |
| c-TiO <sub>2</sub> /MCA(RS) | 1.03 ± 0.04(1.07) | 18.96 ± 0.45(19.41)      | 66.15 ± 1.19(64.96) | 12.97 ± 0.47(13.44) |

Table 2. The performance of the devices with larger active area.
